# Supplementary material for: Oral rabies vaccination of dogs—Experiences from a field trial in Namibia
Source: PubMed Central journal article supplement (PMC9436088; doi:10.1371/journal.pntd.0010422), 2022-08-22
Supplement: pntd.0010422.s001.pdf [file pntd.0010422.s001.pdf]

Supplementary table 1. The mean, minimum and maximum vaccination success rate (%) and the results of the univariate analysis of the selected independent variables (n = number of settings)

| Variable                           | n        | mean | minimum | maximum | p-value (statistical test) |
|------------------------------------|----------|------|---------|---------|----------------------------|
| date                               | <b>8</b> | 82.5 | 69.8    | 89.0    | 0.0048 (Chi <sup>2</sup> ) |
| period of the day                  | <b>4</b> | 82.5 | 81.0    | 84.5    | 0.8790 (Fisher)            |
| team                               | <b>4</b> | 82.5 | 80.2    | 85.3    | 0.4263 (Chi <sup>2</sup> ) |
| level of supervision <sup>1)</sup> | <b>3</b> | 82.5 | 73.3    | 82.8    | 0.4044 (Chi <sup>2</sup> ) |
| social status <sup>2)</sup>        | <b>2</b> | 82.6 | 80.8    | 85.9    | 0.0494 (Fisher)            |
| Size <sup>3)</sup>                 | <b>3</b> | 82.4 | 77.2    | 87.2    | 0.0166 (Chi <sup>2</sup> ) |
| Sex <sup>4)</sup>                  | <b>2</b> | 82.9 | 82.0    | 84.5    | 0.3700 (Fisher)            |

1) 1 dog with no entry for level for supervision; not included in the statistical analysis'

2) 26 dogs with no entry for social status; not included in the statistical analysis

3) 14 dogs with no entry for size; not included in the statistical analysis

4) 30 dogs with no entry for sex; not included in the statistical analysis
