# Supplementary material for: Oral rabies vaccination of dogs—Experiences from a field trial in Namibia
Source: PubMed Central journal article supplement (PMC9436088; doi:10.1371/journal.pntd.0010422), 2022-08-22
Supplement: pntd.0010422.s002.pdf [file pntd.0010422.s002.pdf]

Supplementary table 2: Odds ratios of the Multiple Logistic Regression (MLR) Model.

| coefficient                    | Variable           | Odds ratios   | 95% CI (profile likelihood) |
|--------------------------------|--------------------|---------------|-----------------------------|
| $\beta_0$                      | Intercept          | 0.4756        | 0.1819 to 1.110             |
| $\beta_1$                      | B[21.10.2021]      | 0.6802        | 0.2724 to 1.870             |
| $\beta_2$                      | B[22.10.2021]      | 0.7462        | 0.3063 to 2.016             |
| $\beta_3$                      | B[23.10.2021]      | 0.4022        | 0.1543 to 1.139             |
| $\beta_4$                      | B[25.10.2021]      | 0.3564        | 0.1257 to 1.065             |
| $\beta_5$                      | B[26.10.2021]      | 0.4483        | 0.1568 to 1.350             |
| $\beta_6$                      | B[27.10.2021]      | 0.5079        | 0.1893 to 1.467             |
| $\beta_7$                      | B[28.10.2021]      | 1.125         | 0.4302 to 3.206             |
| <b><math>\beta_8</math></b>    | <b>C[multiple]</b> | <b>0.6188</b> | <b>0.4203 to 0.8984</b>     |
| $\beta_9$                      | D[large]           | 1.254         | 0.6827 to 2.215             |
| <b><math>\beta_{10}</math></b> | <b>D[small]</b>    | <b>0.5862</b> | <b>0.3905 to 0.8656</b>     |
