# Supplementary material for: Oral rabies vaccination of dogs—Experiences from a field trial in Namibia
Source: PubMed Central journal article supplement (PMC9436088; doi:10.1371/journal.pntd.0010422), 2022-08-22
Supplement: pntd.0010422.s003.pdf [file pntd.0010422.s003.pdf]

Supplementary table 3: The effect of bait handling (consumption - amount of bait matrix consumed; chewing time – total time [seconds] dog spend chewing on the bait; sachet – fate of sachet after bait consumption, discarded or swallowed) on vaccination success (%); N – number of dogs offered a bait, n – number of dogs considered successfully vaccinated. Data sets with an entry 'unknown' for these variables were excluded from statistical analysis.

| variable              | N   | n   | %    | p-value                    |
|-----------------------|-----|-----|------|----------------------------|
| <u>Consumption</u>    |     |     |      |                            |
| - complete (100%)     | 731 | 682 | 92.3 |                            |
| - most (>50%)         | 133 | 119 | 89.5 | 0.2822 (Chi <sup>2</sup> ) |
| - little (<50%)       | 10  | 9   | 90.0 |                            |
| <u>Chewing time</u>   |     |     |      |                            |
| - long (>60sec)       | 89  | 76  | 85.4 |                            |
| - medium (30-60sec)   | 318 | 297 | 93.4 | 0.0039 (Chi <sup>2</sup> ) |
| - short (10-30sec)    | 225 | 217 | 96.4 |                            |
| - very short (<10sec) | 242 | 219 | 90.5 |                            |
| <u>sachet</u>         |     |     |      |                            |
| - discarded           | 425 | 384 | 90.4 | 0.0135 (Fisher)            |
| - swallowed           | 442 | 419 | 94.8 |                            |
